# Supplementary material for: NF-κB inhibitor alpha has a cross-variant role during SARS-CoV-2 infection in ACE2-overexpressing human airway organoids
Source: PubMed Central journal article supplement — bioRxiv. 2022 Aug 2:2022.08.02.502100. Preprint. [Version 1] doi: 10.1101/2022.08.02.502100 (PMC9387123; doi:10.1101/2022.08.02.502100), 2022-08-02

# Supplementary Figure 1

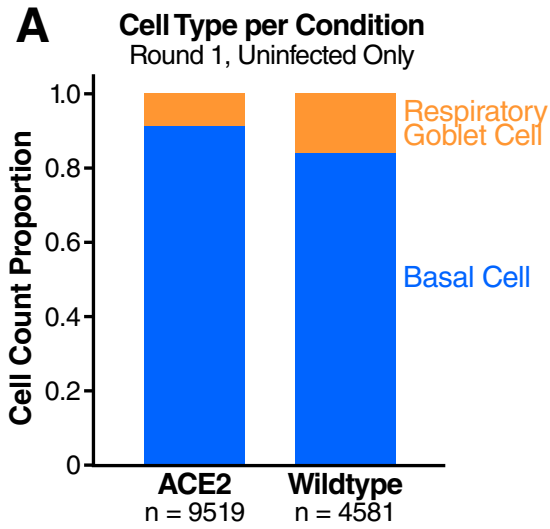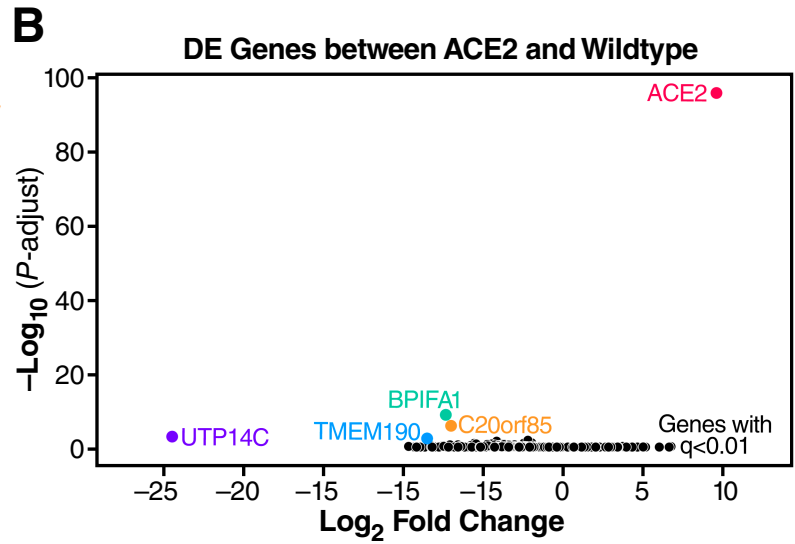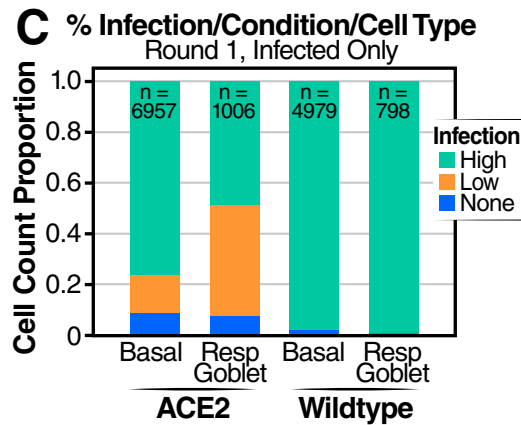

**D Infection GMM Annotated**

|                   | High        | Low           | None          |
|-------------------|-------------|---------------|---------------|
| <b>ACE2 Basal</b> | 8.24% n=573 | 15.01% n=1044 | 76.76% n=5340 |
| Resp. goblet      | 7.06% n=71  | 43.94% n=442  | 49.01% n=148  |
| <b>WT Basal</b>   | 1.47% n=73  | 0.04% n=2     | 98.49% n=4904 |
| Resp. goblet      | 0.25% n=2   | 0% n=0        | 99.75% n=796  |

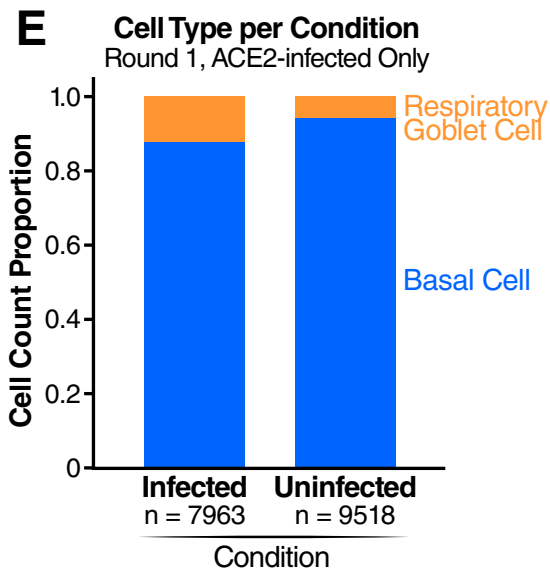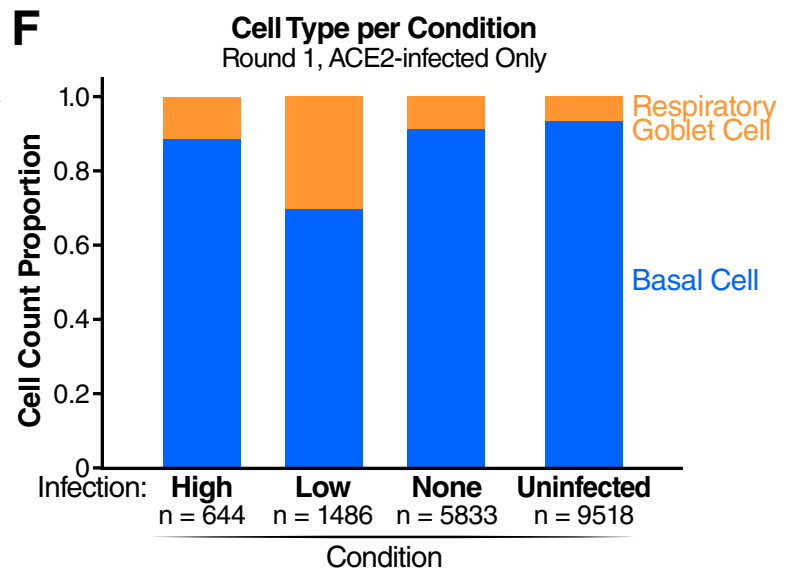

## Supplementary Figure 2

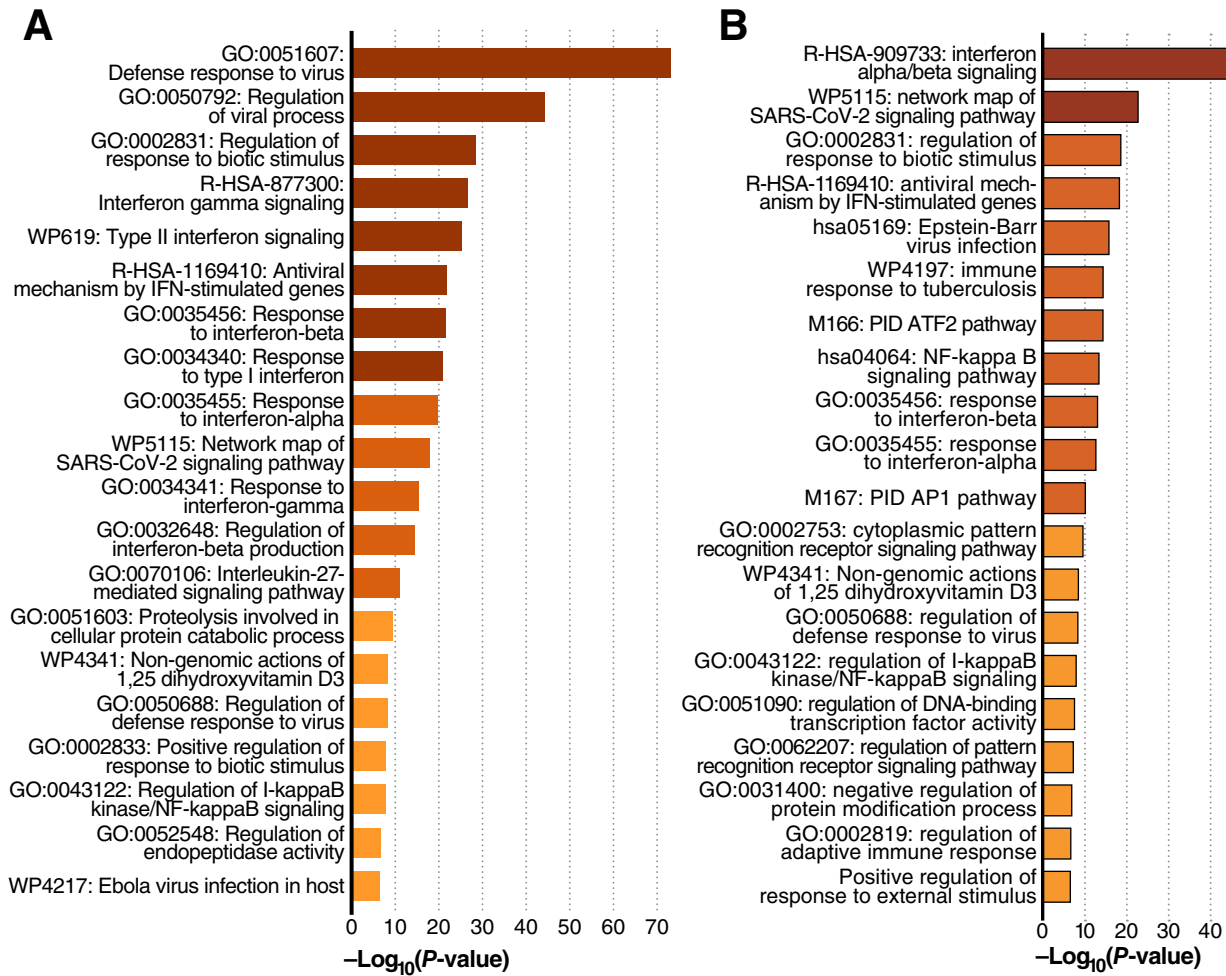

### Supplementary Figure 3

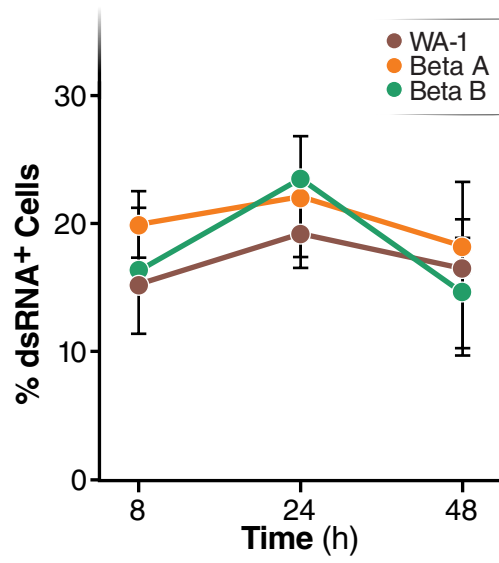

# Supplementary Figure 4

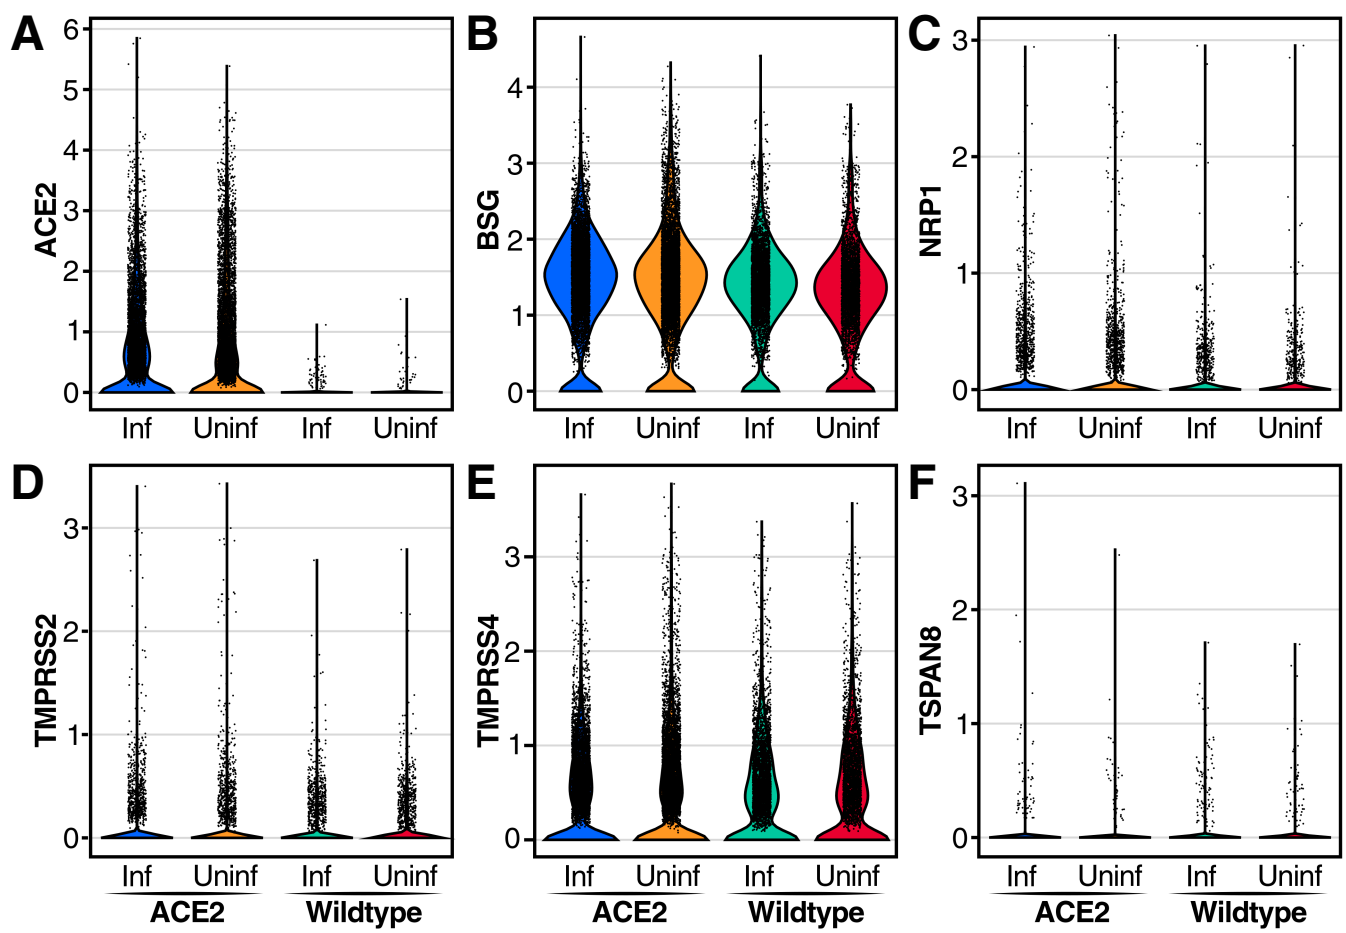

Supplement: media-1.pdf [file media-1.pdf]
