# Supplementary material for: NF-κB inhibitor alpha has a cross-variant role during SARS-CoV-2 infection in ACE2-overexpressing human airway organoids
Source: PubMed Central journal article supplement — bioRxiv. 2022 Aug 2:2022.08.02.502100. Preprint. [Version 1] doi: 10.1101/2022.08.02.502100 (PMC9387123; doi:10.1101/2022.08.02.502100), 2022-08-02
Supplement: NIHPP2022.08.02.502100V1-supplement-1.pdf [file NIHPP2022.08.02.502100V1-supplement-1.pdf]

**Supplementary Table 1:** Top 25 genes correlated with SCV2 levels per variant.

|    | Alpha      | Beta_A     | Beta_B     | Epsilon    | WA-1       |
|----|------------|------------|------------|------------|------------|
| 0  | CXCL3      | CXCL3      | NFKBIA     | CXCL3      | DRD5       |
| 1  | TNFAIP3    | ICAM1      | PLAU       | TNFAIP3    | CD33       |
| 2  | NFKBIA     | NFKBIA     | TNFAIP3    | PLAU       | AC103808.1 |
| 3  | CXCL2      | AC091544.4 | CXCL3      | NFKBIA     | AL357873.1 |
| 4  | DUSP8      | TNFAIP3    | EGR1       | CXCL2      | LRRIQ4     |
| 5  | PLAU       | UBASH3A    | CXCL8      | CXCL8      | LINC02284  |
| 6  | CXCL8      | NRAP       | AC127526.5 | KLHL5      | BEST3      |
| 7  | KLF6       | AC010624.3 | NCOA7      | DUSP8      | U91328.3   |
| 8  | ICAM1      | AC008115.4 | EDN1       | CXCL1      | AC084816.1 |
| 9  | CXCL1      | DUSP8      | HES1       | NFKBIZ     | CXCL3      |
| 10 | KLHL5      | AL450270.1 | KLF6       | LCN2       | TNFAIP3    |
| 11 | EDN1       | CXCL1      | CXCL2      | EGR1       | ICAM1      |
| 12 | BIRC3      | CXCL8      | NFKBIZ     | TM4SF1     | NFKBIA     |
| 13 | NFKBIZ     | EDN1       | JUN        | KLF6       | EGR1       |
| 14 | STX19      | KLHL5      | CXCL1      | PIM3       | LINC01354  |
| 15 | CCN1       | NR1D1      | AP003498.2 | ICAM1      | AL139118.1 |
| 16 | EGR1       | NFKBIZ     | DUSP8      | AC127526.5 | AP001001.1 |
| 17 | TMEM156    | CXCL2      | ARRDC3     | AP003498.2 | RAB40AL    |
| 18 | PIM3       | BHLHE41    | ICAM1      | AC055720.1 | AP006261.1 |
| 19 | AC127526.5 | EGR1       | TM4SF1     | AC010255.1 | AC032044.1 |
| 20 | IL6        | BIRC3      | EFNA1      | LINC01814  | NXPH3      |
| 21 | IL32       | PLAU       | ZC3H12A    | AC127537.1 | MYRFL      |
| 22 | CD83       | KLF6       | AL627171.2 | EDN1       | AC022509.2 |
| 23 | NCOA7      | HIST1H2BD  | KLHL5      | AC005062.1 | TNF        |
| 24 | DUSP10     | IPCEF1     | MT-ND3     | SFRP4      | AC021483.2 |

## Supplementary Table 2: qPCR primers

| Gene            | Forward                        | Reverse                    | Probe                          |
|-----------------|--------------------------------|----------------------------|--------------------------------|
| FOXJ1           | TCGTATGCCACGCTCATCTG           | CGGATTGAATTCTGCCAGG<br>T   |                                |
| MUC5AC          | CCTACAAAGCTGAGGCCTGT           | GACCCTCCTCTCAATGGTGC       |                                |
| CC10            | TCCTCCACCATGAAACTCGC           | AGGAGGGTTTCGATGACAC<br>G   |                                |
| p63             | ACCTGGAAAACAATGCCCAGA          | ACGAGGAGCCGTTCTGAAT<br>C   |                                |
| KRT5            | GCATCACCGTTCCTGGGTAA           | GACACACTTGACTGGCGAG<br>A   |                                |
| ACE2            | CGAGTGGCTAATTTGAAACCAAG<br>AA  | ATTGATACGGCTCCGGGAC<br>A   |                                |
| TMPRSS2         | ATGGCTTTGAACTCAGGGTC           | TTAGCCCGTCTGCCCTCATT<br>T  |                                |
| SARS-CoV-2<br>N | AAATTTTGGGGACCAGGAAC           | TGGCACCTGTGTAGGTCAA<br>C   | ATGTCGCGCATTGGCATGGA           |
| SARS-CoV-2<br>E | ACAGGTACGTTAATAGTTAATAG<br>CGT | ATATTGCAGCAGTACGCAC<br>ACA | ACACTAGCCATCCTTACTGCGCT<br>TCG |
